# Supplementary material for: Rapid Screening of Potential Phosphodiesterase Inhibitors from the Roots of Ilex pubescens Hook. et Arn. Using a Combination of Ultrafiltration and LC–MS
Source: Hindawi journal article supplement (doi:10.1155/2017/2749643), 2017-01-01
Supplement: f1 [file 2749643.f1.pdf]

# Supplementary data

**Table S1.** LC–MS data comparison of *I. pubescens* roots extract and ultrafiltrate.

| No. | Formula                                         | Compound                        | Theoretical<br>([M-H] <sup>-</sup> ) | t <sub>R</sub> (min) |               |          | Experimental <i>m/z</i> (error) |                     |                     |
|-----|-------------------------------------------------|---------------------------------|--------------------------------------|----------------------|---------------|----------|---------------------------------|---------------------|---------------------|
|     |                                                 |                                 |                                      | extract              | ultrafiltrate | Standard | extract                         | ultrafiltrate       | Standard            |
| 1   | C <sub>16</sub> H <sub>18</sub> O <sub>9</sub>  | Chlorogenic acid                | 353.0873                             | 12.312               | 12.505        | 12.348   | 353.0882 (2.5 ppm)              | 353.0883 (2.8 ppm)  | 353.0874 (0.3 ppm)  |
| 2   | C <sub>28</sub> H <sub>36</sub> O <sub>13</sub> | Tortoside A                     | 579.2078                             | 25.468               | 25.467        |          | 579.2095 (2.9 ppm)              | 579.2040 (-6.4 ppm) |                     |
| 3   | C <sub>25</sub> H <sub>24</sub> O <sub>12</sub> | Isochlorogenic acid B           | 515.1190                             | 25.630               | 25.622        | 25.630   | 515.1230 (7.8 ppm)              | 515.1199 (1.7 ppm)  | 515.1212 (4.3 ppm)  |
| 4   | C <sub>25</sub> H <sub>24</sub> O <sub>12</sub> | Isochlorogenic acid A           | 515.1190                             | 27.838               | 27.653        |          | 515.1190 (0.0 ppm)              | 515.1163 (-5.2 ppm) |                     |
| 5   | C <sub>25</sub> H <sub>24</sub> O <sub>12</sub> | Isochlorogenic acid C           | 515.1190                             | 29.895               | 29.787        | 29.643   | 515.1215 (4.9 ppm)              | 515.1189 (-0.2 ppm) | 515.1194 (0.8 ppm)  |
| 6   | C <sub>34</sub> H <sub>30</sub> O <sub>15</sub> | 3,4,5-Tricaffeoylquinic<br>acid | 677.1507                             | 41.972               | 41.710        |          | 677.1533 (3.8 ppm)              | 677.1494 (-1.9 ppm) |                     |
| 7   | C <sub>47</sub> H <sub>76</sub> O <sub>18</sub> | Ilexsaponin B <sub>3</sub>      | 927.4953                             | 45.220               | 45.182        |          | 927.4996 (4.6 ppm)              | 927.4965 (1.3 ppm)  |                     |
| 8   | C <sub>47</sub> H <sub>76</sub> O <sub>17</sub> | Ilexsaponin B <sub>2</sub>      | 911.5004                             | 56.657               | 56.435        | 56.463   | 911.5049 (4.9 ppm)              | 911.4976 (-3.1 ppm) | 911.4960 (-4.8 ppm) |
| 9   | C <sub>36</sub> H <sub>56</sub> O <sub>11</sub> | Ilexsaponin A <sub>1</sub>      | 663.3744                             | 57.873               | 57.787        | 57.868   | 663.3766 (3.3 ppm)              | 663.3747 (0.5 ppm)  | 663.3709 (-5.3 ppm) |
| 10  | C <sub>41</sub> H <sub>66</sub> O <sub>13</sub> | Ilexsaponin B <sub>1</sub>      | 765.4425                             | 60.828               | 60.597        | 60.572   | 765.4400 (-3.3 ppm)             | 765.4444 (2.5 ppm)  | 765.4437 (1.6 ppm)  |
| 11  | C <sub>30</sub> H <sub>46</sub> O <sub>6</sub>  | Ilexgenin A                     | 501.3216                             | 75.675               | 75.628        | 75.567   | 501.3239 (4.6 ppm)              | 501.3227 (2.2 ppm)  | 501.3195 (-4.2 ppm) |

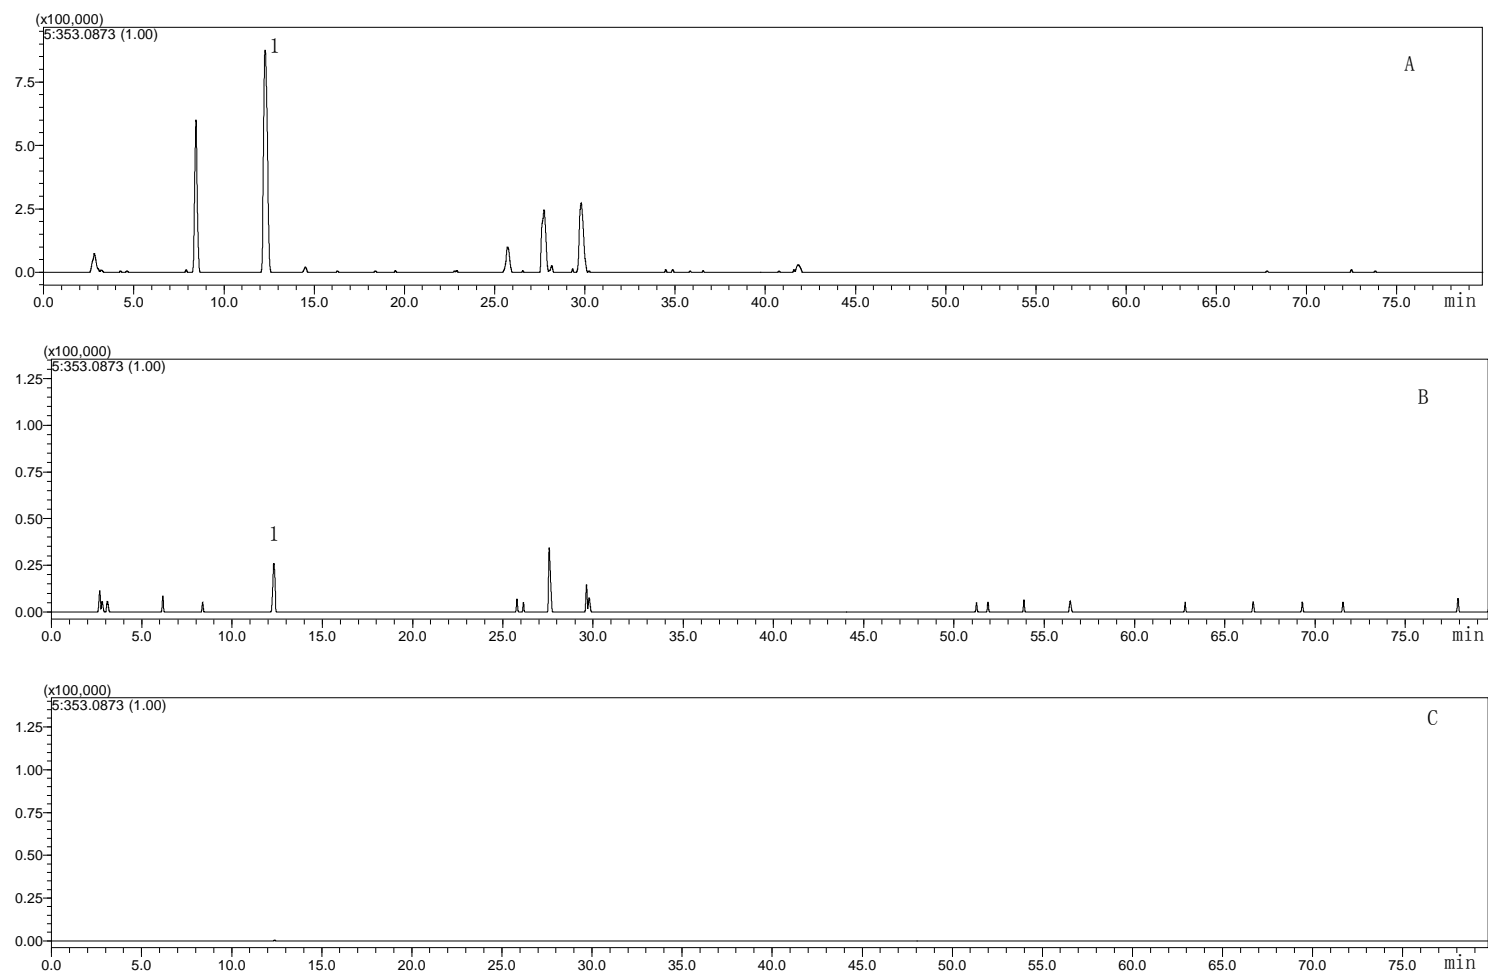

**Figure S1.** EIC chromatograms of compound **1** in negative mode at  $m/z$  353.0873 from *I. pubescens* roots extract (A), ultrafiltrate (B) and blank sample (C).

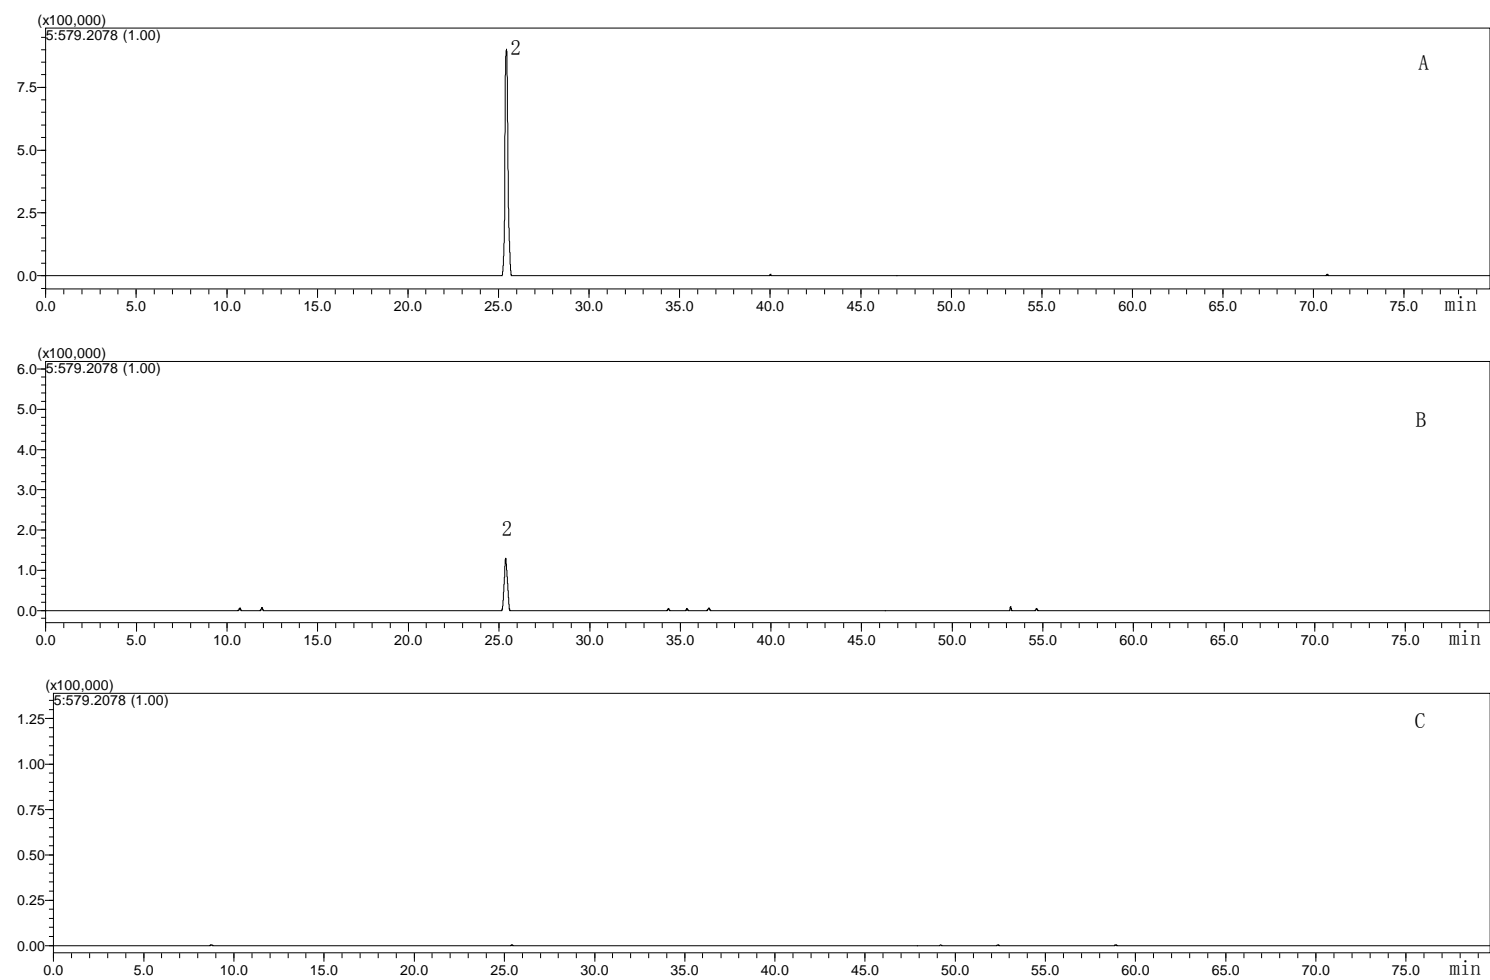

**Figure S2.** EIC chromatograms of compound **2** in negative mode at  $m/z$  579.2078 from *I. pubescens* roots extract (A), ultrafiltrate (B) and blank sample (C).

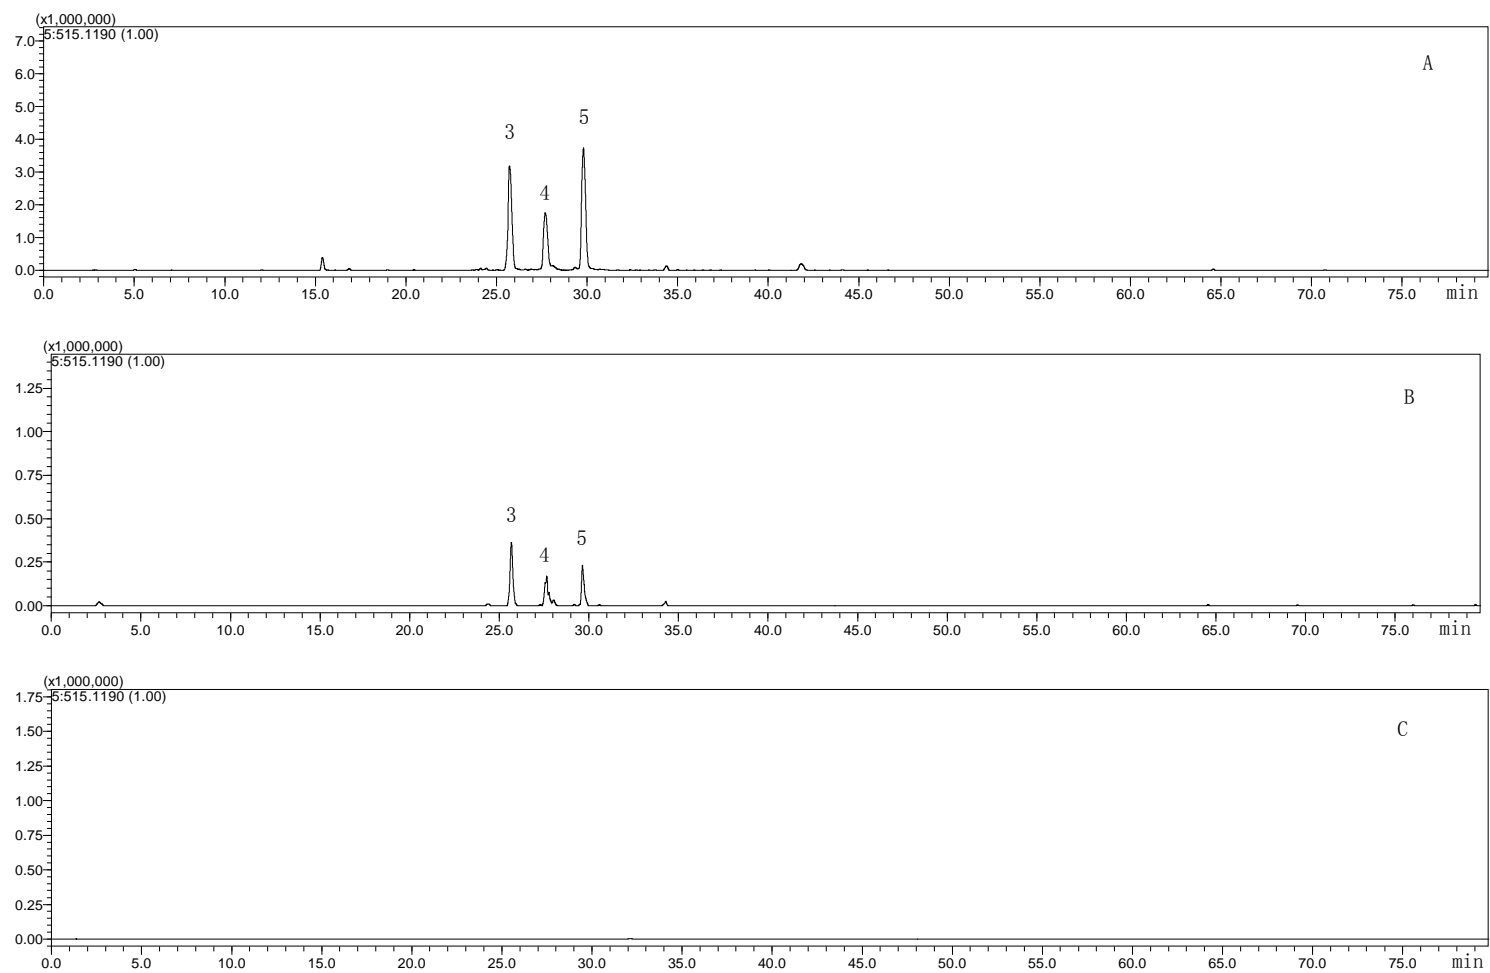

**Figure S3.** EIC chromatograms of compound **3**, **4**, **5** in negative mode at  $m/z$  515.1190 from *I. pubescens* roots extract (A), ultrafiltrate (B) and blank sample (C).

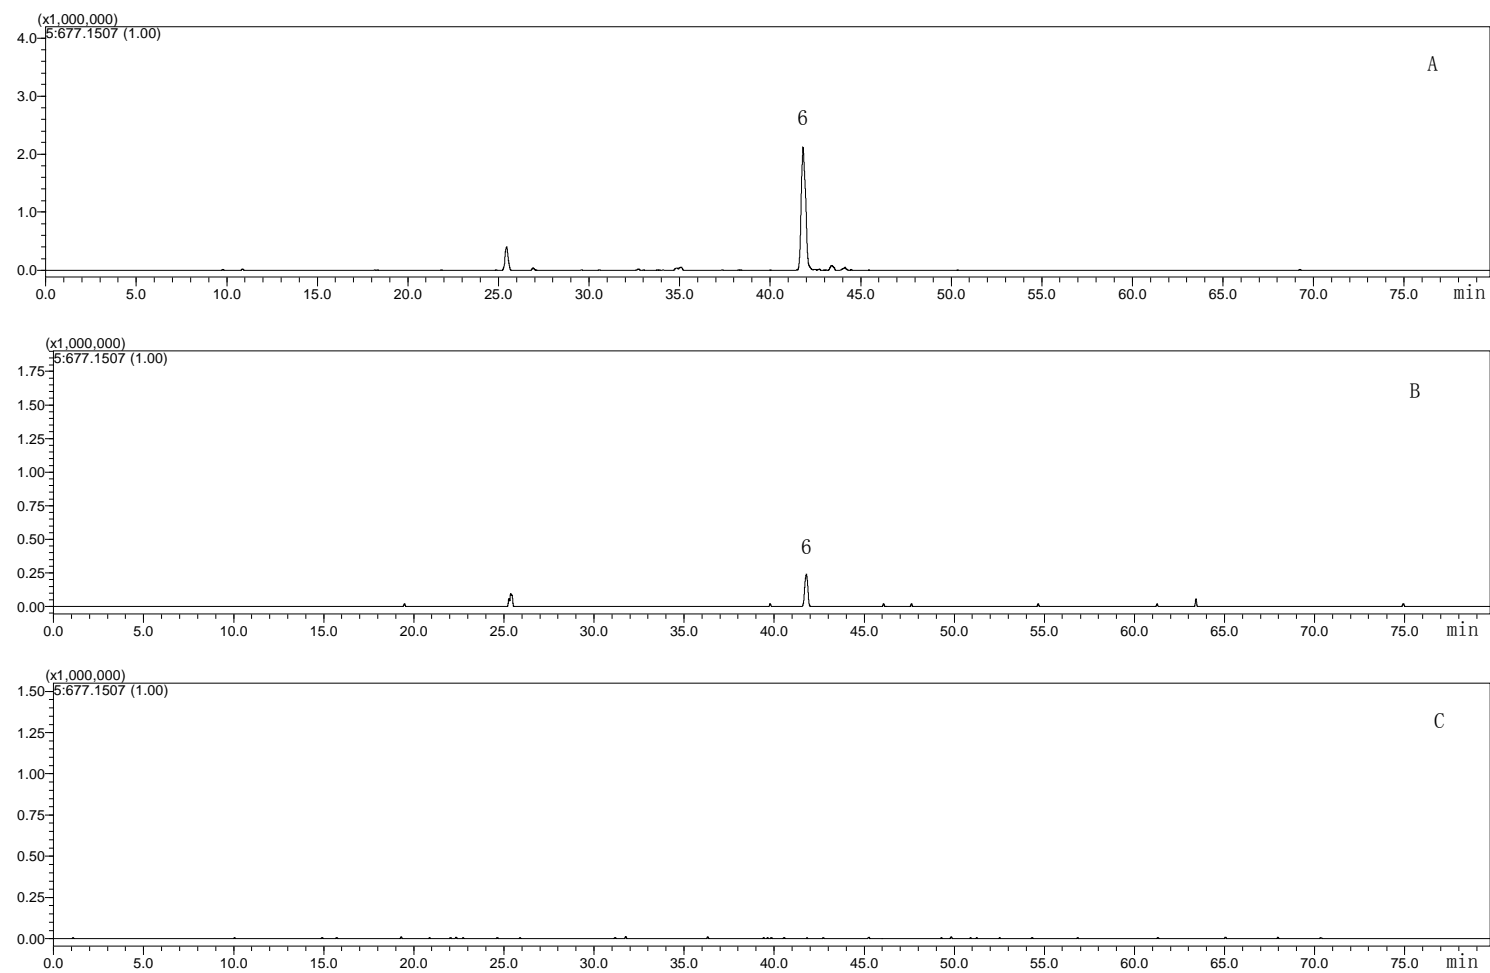

**Figure S4.** EIC chromatograms of compound **6** in negative mode at  $m/z$  677.1507 from *I. pubescens* roots extract (A), ultrafiltrate (B) and blank sample (C).

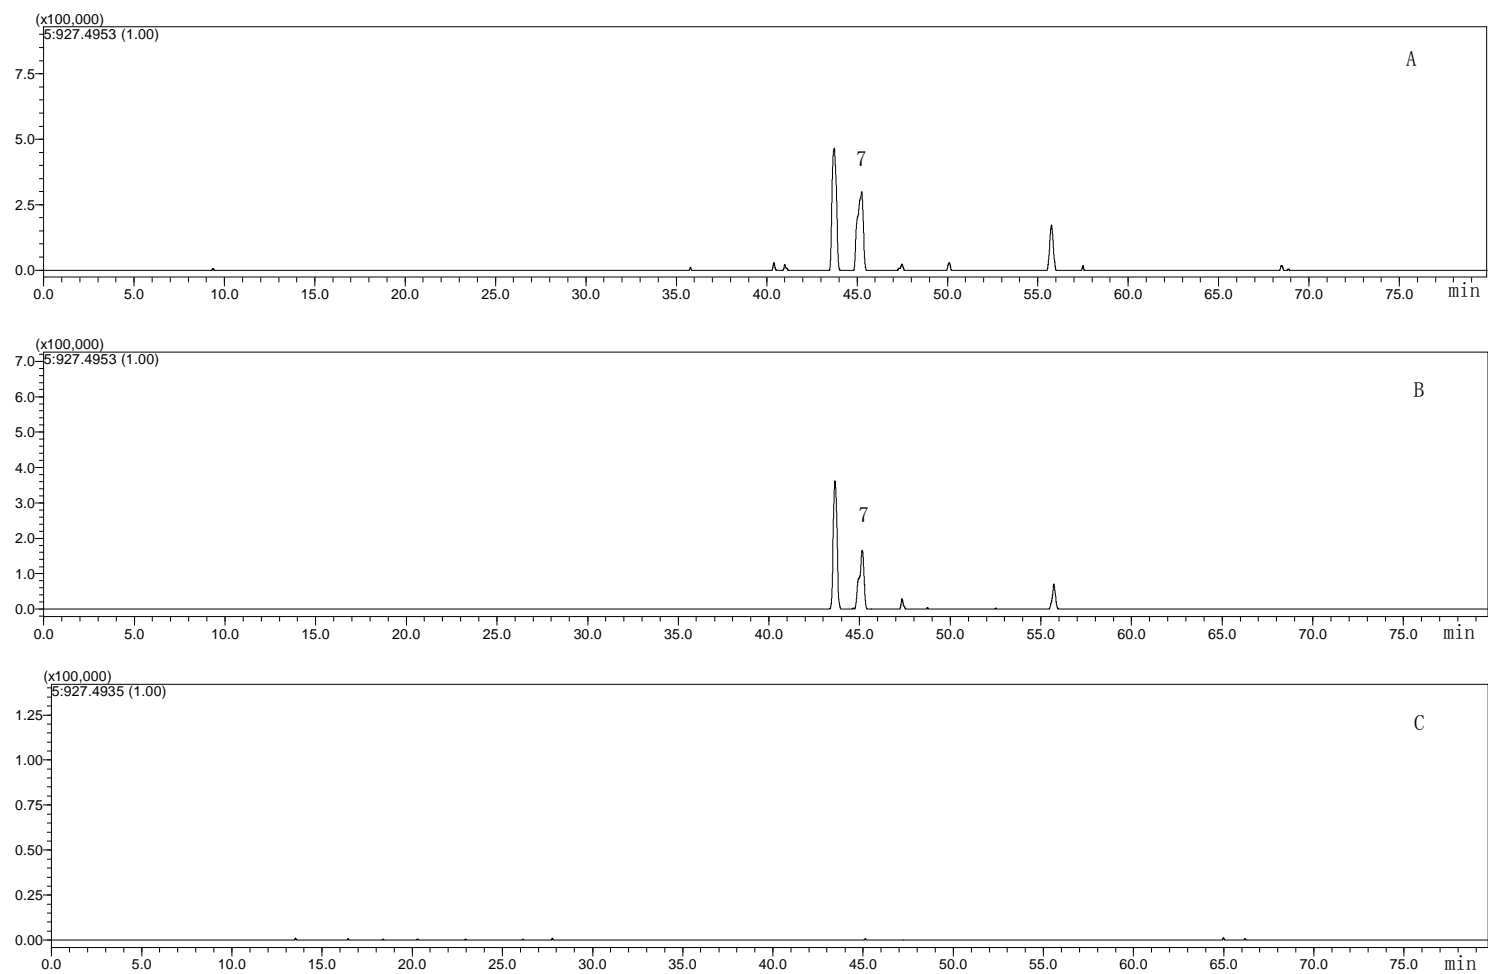

**Figure S5.** EIC chromatograms of compound **7** in negative mode at  $m/z$  927.4953 from *I. pubescens* roots extract (A), ultrafiltrate (B) and blank sample (C).

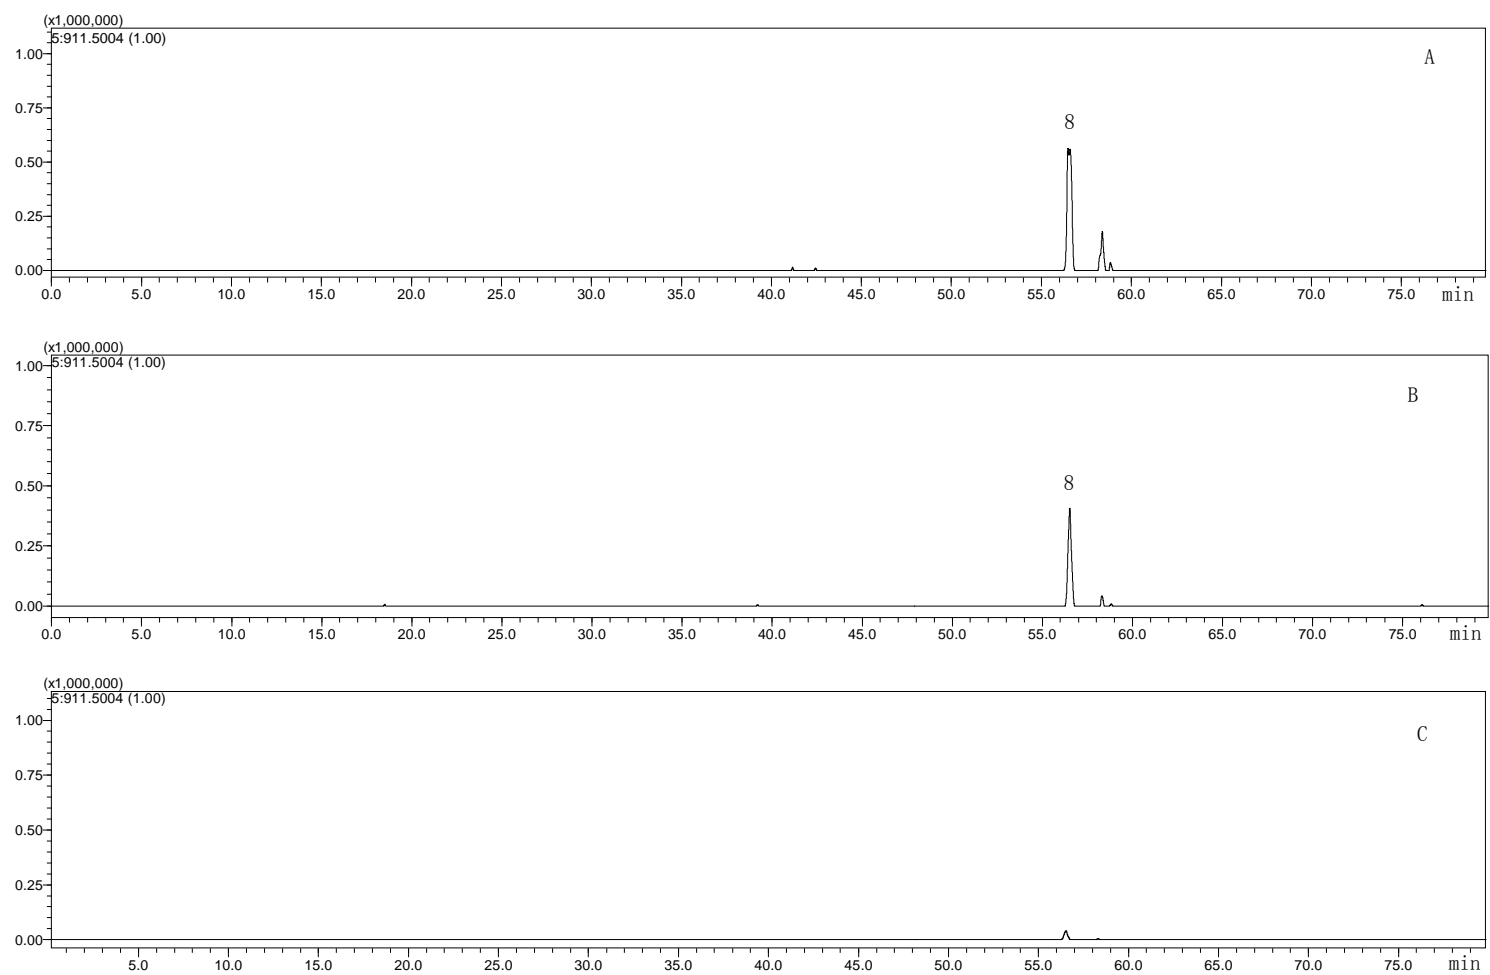

**Figure S6.** EIC chromatograms of compound **8** in negative mode at  $m/z$  911.5004 from *I. pubescens* roots extract (A), ultrafiltrate (B) and blank sample (C).

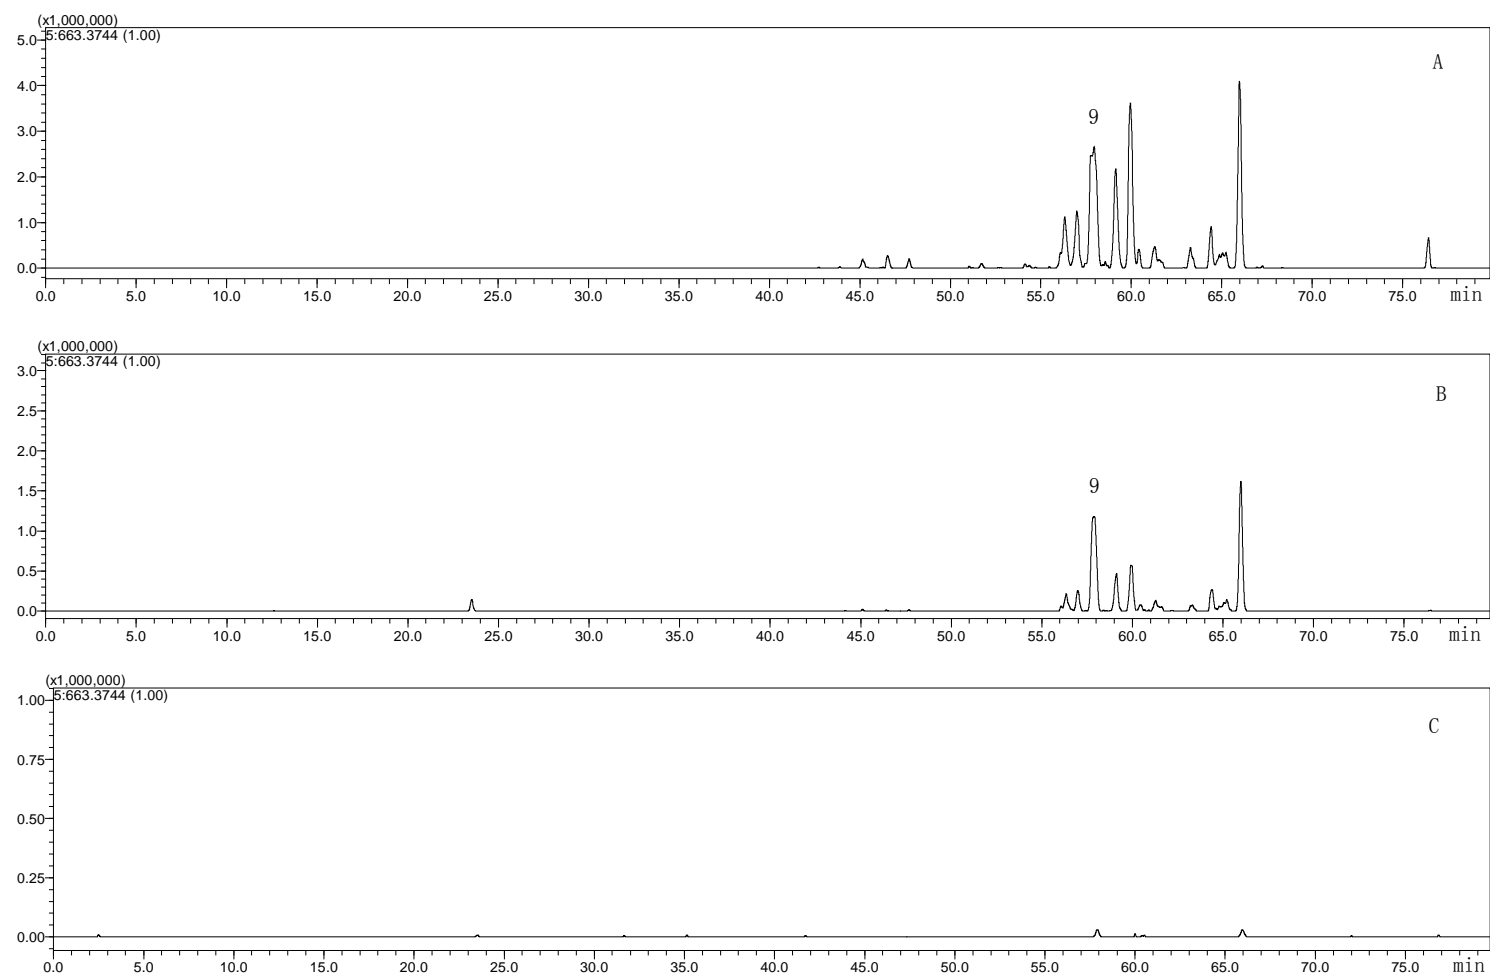

**Figure S7.** EIC chromatograms of compound **9** in negative mode at  $m/z$  663.3744 from *I. pubescens* roots extract (A), ultrafiltrate (B) and blank sample (C).

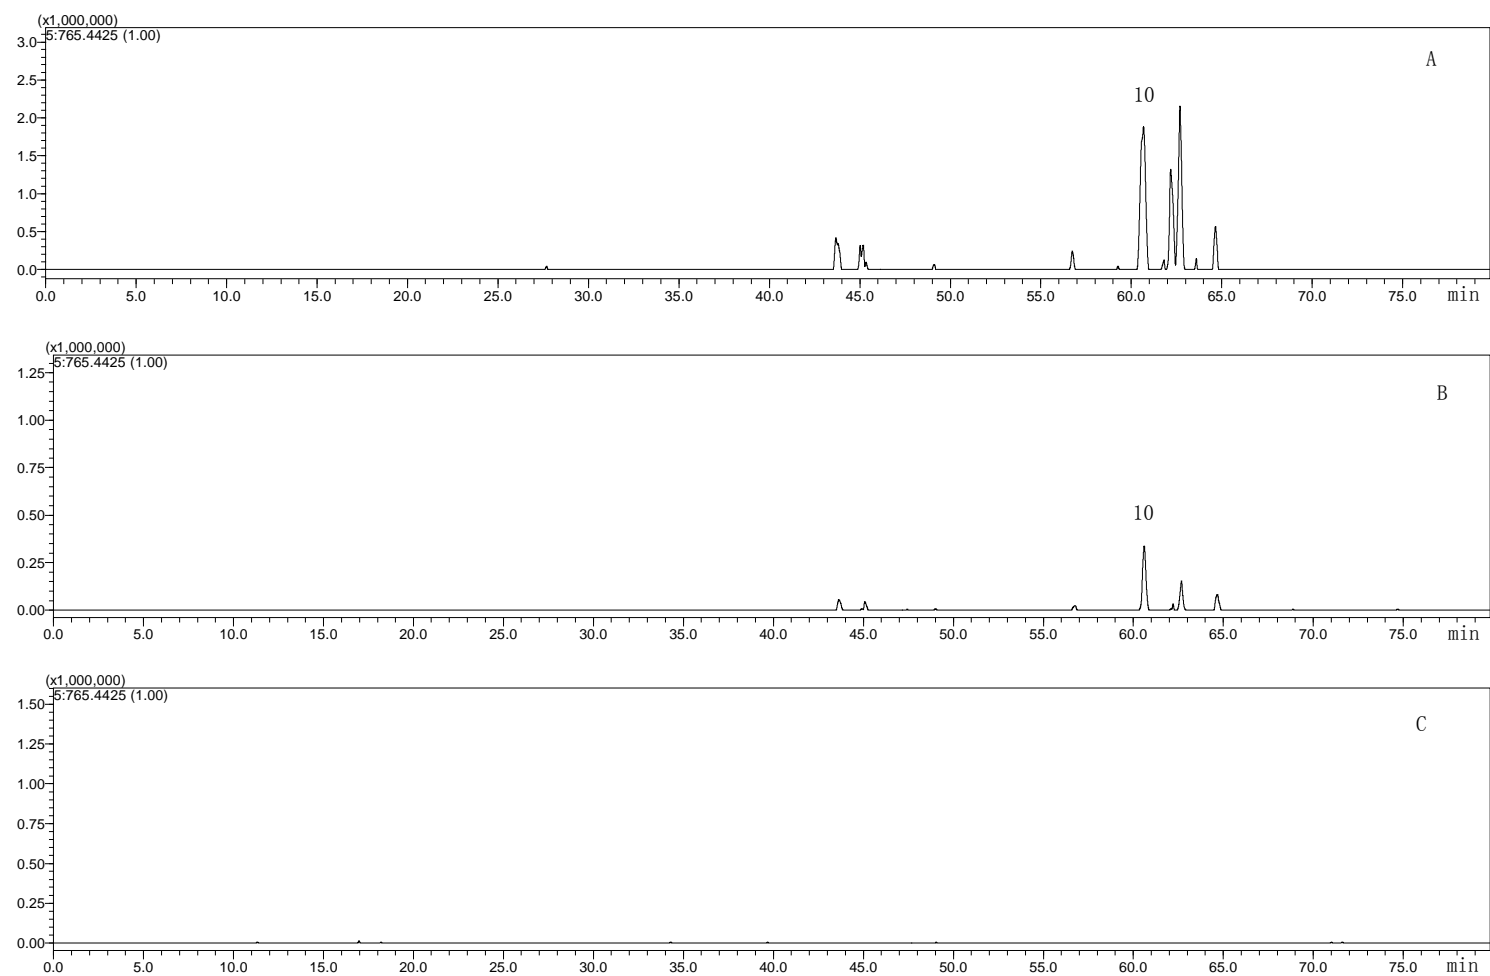

**Figure S8.** EIC chromatograms of compound **10** in negative mode at  $m/z$  765.4425 from *I. pubescens* roots extract (A), ultrafiltrate (B) and blank sample (C).

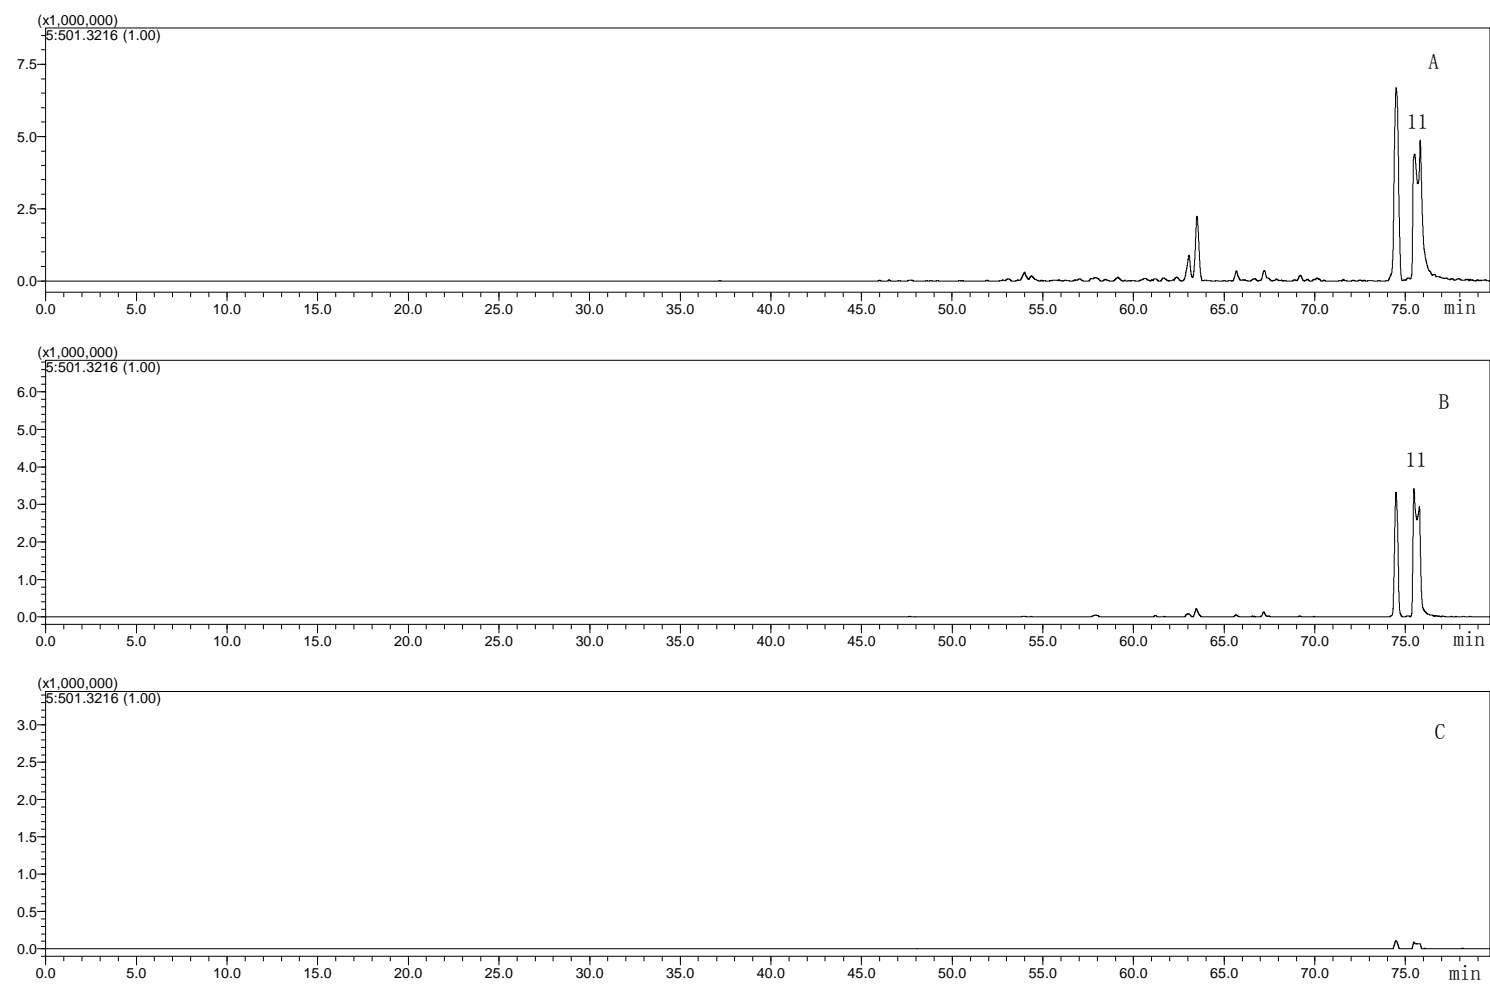

**Figure S9.** EIC chromatograms of compound **11** in negative mode at  $m/z$  501.3216 from *I. pubescens* roots extract (A), ultrafiltrate (B) and blank sample (C).
